# Supplementary material for: Barrier-assisted vapor phase CVD of large-area MoS2 monolayers with high spatial homogeneity
Source: Royal Society of Chemistry journal article supplement (doi:10.1039/d0na00524j), 2020-01-01
Supplement: d0na00524j1.pdf [file d0na00524j1.pdf]

## Electronic Supplementary Information

### Barrier-assisted vapor phase CVD of large-area homogeneous MoS<sub>2</sub> monolayers with high spatial homogeneity

*Santhosh Durairaj,<sup>a</sup> P. Krishnamoorthy,<sup>a</sup> Navanya Raveendran,<sup>a</sup> Beo Deul Ryu,<sup>b</sup> Chang-Hee Hong,<sup>b</sup> Tae Hoon Seo,<sup>c</sup> S. Chandramohan<sup>\*a</sup>*

<sup>a</sup>2D Materials and Devices Laboratory, Department of Physics and Nanotechnology, SRM Institute of Science and Technology, Kattankulathur 603 203, Tamil Nadu, India

<sup>b</sup>Department of Semiconductor Science and Technology, Semiconductor Physics Research Center, Chonbuk National University, Jeonju 54896, South Korea

<sup>c</sup>Nano-photonics Convergence Technology, Korea Institute of Industrial Technology, Gwangju61012, South Korea

**E-mail: [chandras3@srmist.edu.in](mailto:chandras3@srmist.edu.in)**

### MoS<sub>2</sub> grown at different temperatures:

The effect of growth temperature is also studied by performing the growth experiments at different temperatures from 700 to 800 °C. Irrespective of the growth time, only triangular flakes were formed at a growth temperature of 700 °C. When the temperature is increased to 750 °C, the MoS<sub>2</sub> coverage on the substrate significantly increased and at an elevated temperature of 800°C despite continuous MoS<sub>2</sub> growth, nucleation of additional layers as well as secondary phases have been observed on the first layer.

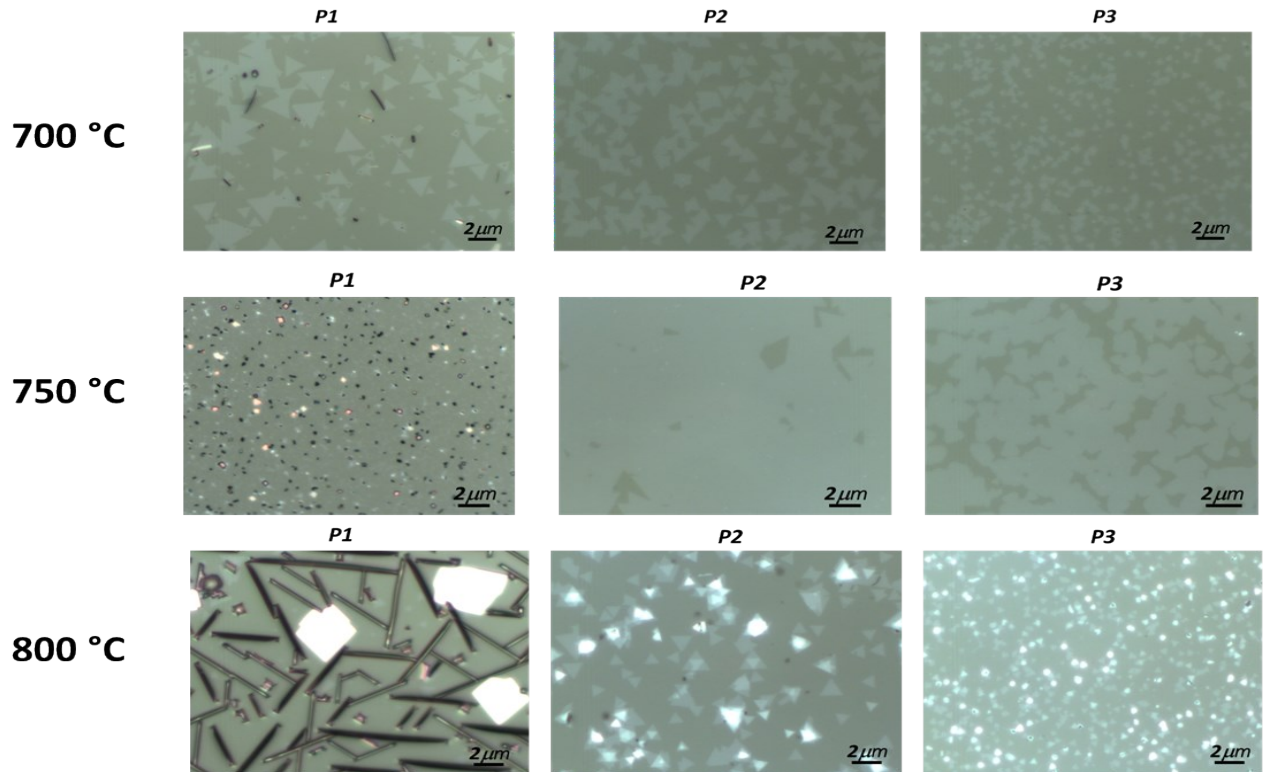

**Fig. S1.** Optical microscope images of MoS<sub>2</sub> grown at different temperatures (700, 750 and 800 °C) at different substrate positions P<sub>1</sub>, P<sub>2</sub> and P<sub>3</sub>. The second and few layer nucleation sites (brighter regions) are clearly visible for the sample grown at 800°C.

### Characterization of MoS<sub>2</sub> grown at 800 °C:

At 800 °C, the growth was very rapid and hence no control over the nucleation of additional layers is facilitated. The optical microscope image clearly shows several triangular flakes on the first layer. Furthermore, the bright spots are identified as few- and/or multi-layered flakes, according to Raman spectra (Fig. 3) which is further corroborated by TEM analysis. According to the TEM image shown in figure b, the bulk-like MoS<sub>2</sub> is identified to have many triangular flakes stacked one over another.

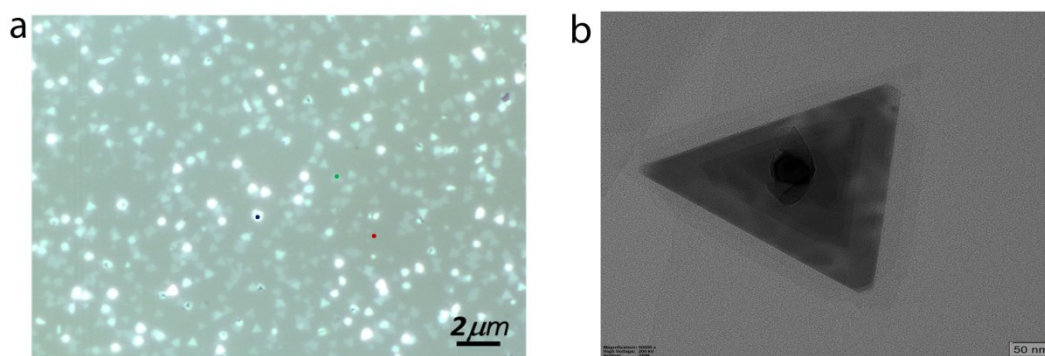

**Fig. S2.** (a) Optical microscope image of MoS<sub>2</sub> grown at 800 °C in P<sub>3</sub> position. (b) TEM image of bulk layer nucleation site.

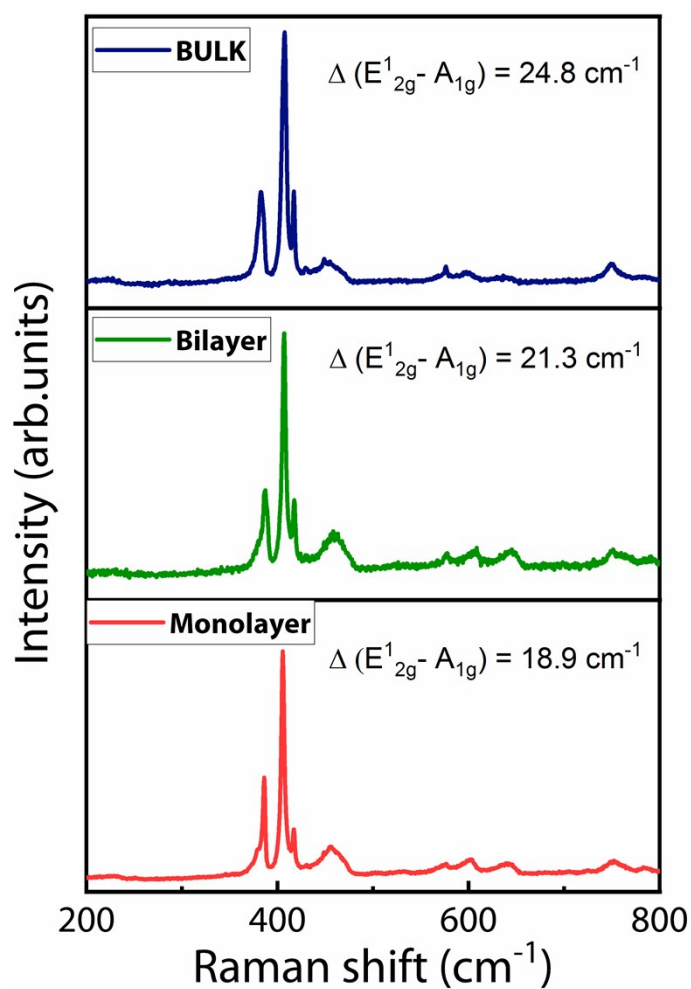

**Fig. S3.** Raman spectra collected at different points of optical contrast seen in the optical microscope image in figure 2a. By acquiring the spectrum at different points, we ensured that the different optical contrast seen in the optical image correspond to different layer thickness of MoS<sub>2</sub>.

### Effect of growth time: Case study for 750 °condition

Based on the results, growth temperature of 750 °C can be considered optimum to grow continuous MoS<sub>2</sub> without second layer nucleation. Since a growth time of 10 minutes did not result continuous MoS<sub>2</sub>, we varied the growth time and studied the growth behavior at this particular temperature. The optical images of the sample grown at 10, 20, and 30 minutes are shown in figure 4. It is obvious that the coverage of the MoS<sub>2</sub> increased with increasing growth time. Furthermore, there is no obvious formation of secondary phases or additional layers in the form of triangular flakes observed. However, complete coalescence did not happen even at a growth time of 30 minutes. Hence, a growth temperature slightly above 750 °C is attempted in this study to get fully coalesced MoS<sub>2</sub> monolayers.

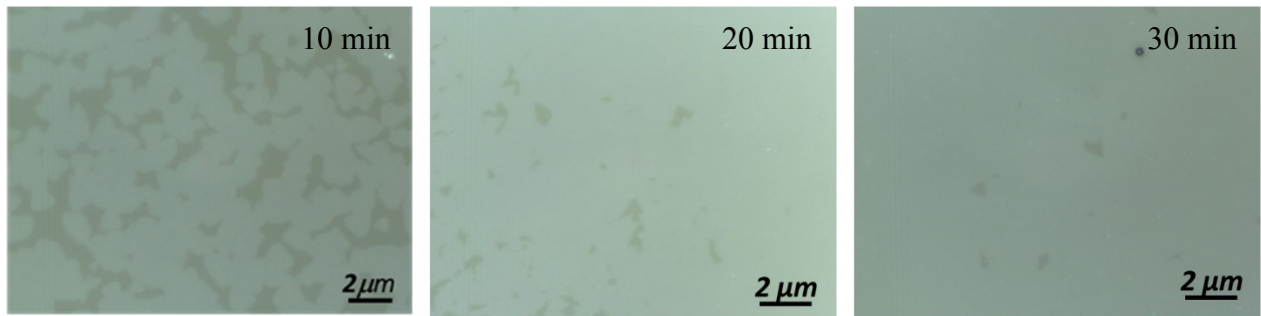

**Fig. S4.** Optical microscope images depicting morphology evolution with increasing growth time from 10 minutes to 30 minutes for MoS<sub>2</sub> grown at 750 °C.

### Large-scale uniformity of monolayer MoS<sub>2</sub> grown at 775°C:

To check the quality and thickness uniformity of MoS<sub>2</sub> over the entire substrate, we acquired the Raman and PL spectrum at different sampling points as illustrated in figure 5a. The frequency difference ( $\Delta\omega$ ) between the E<sub>2g</sub><sup>1</sup> and the A<sub>1g</sub> modes is considered as a figure of merit to evaluate the thickness uniformity of the grown MoS<sub>2</sub>. The  $\Delta\omega$  values were found to be within the range (from 18.9 to 19.45 cm<sup>-1</sup>) reported for monolayer MoS<sub>2</sub>. Furthermore, the PL spectrum taken at several points showed similar results with a strong emission peak around 1.87-1.89 eV.

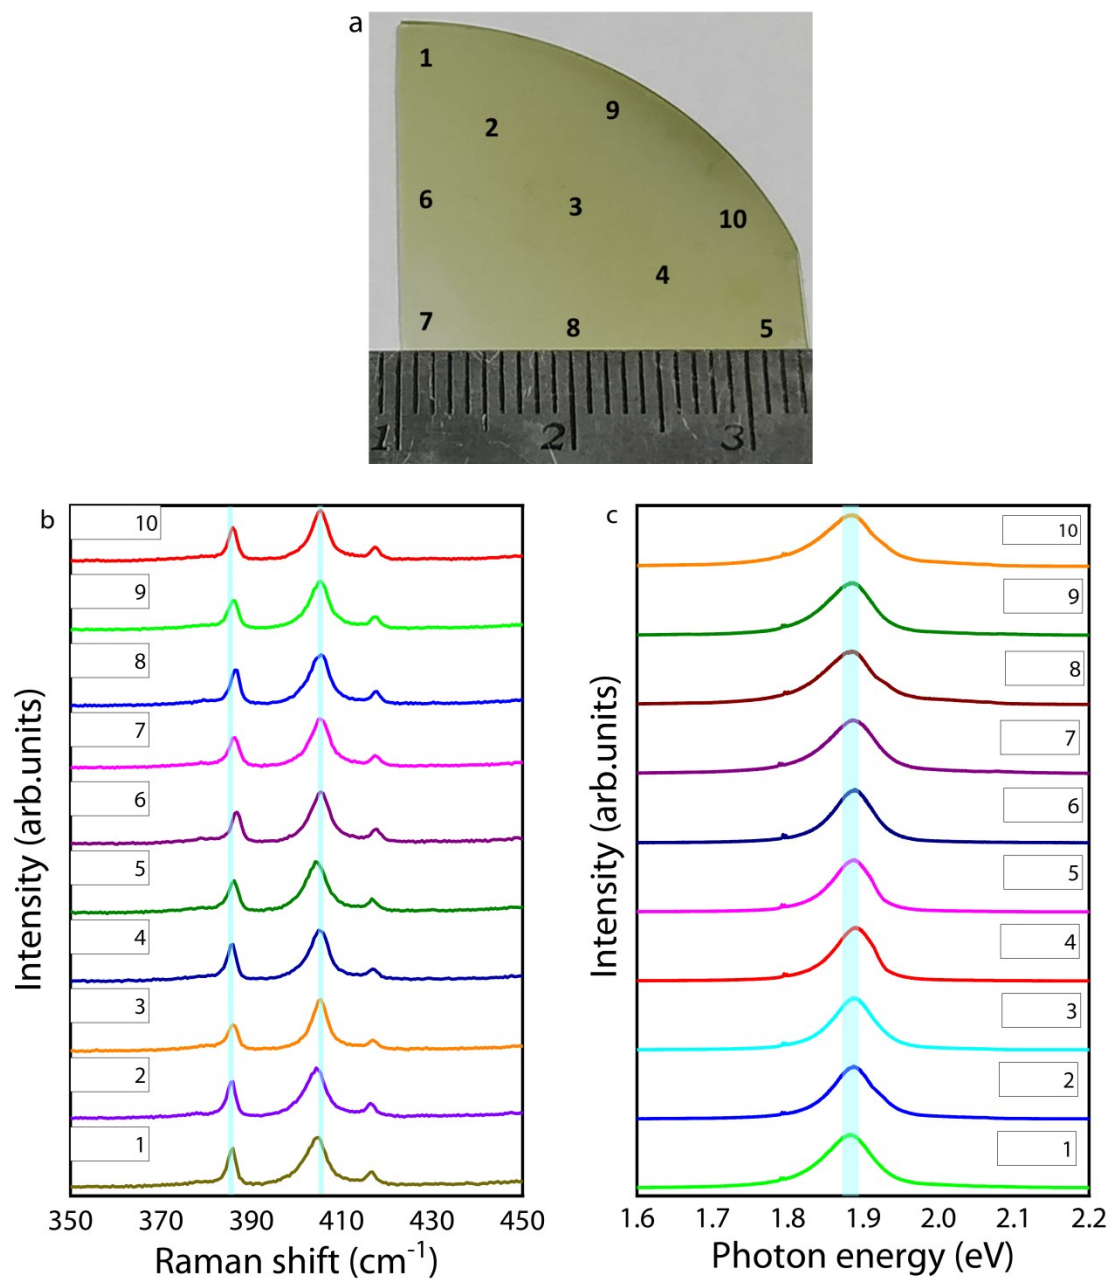

**Fig. S5. (a)** Photograph of a typical sample grown at position P<sub>3</sub>. The numbers on the image are representative points at which micro-Raman and PL measurements were performed. **(b, c)** Raman and PL spectra of MoS<sub>2</sub> film confirming the thickness and optical homogeneity.

### SAED pattern for MoS<sub>2</sub> film at different points:

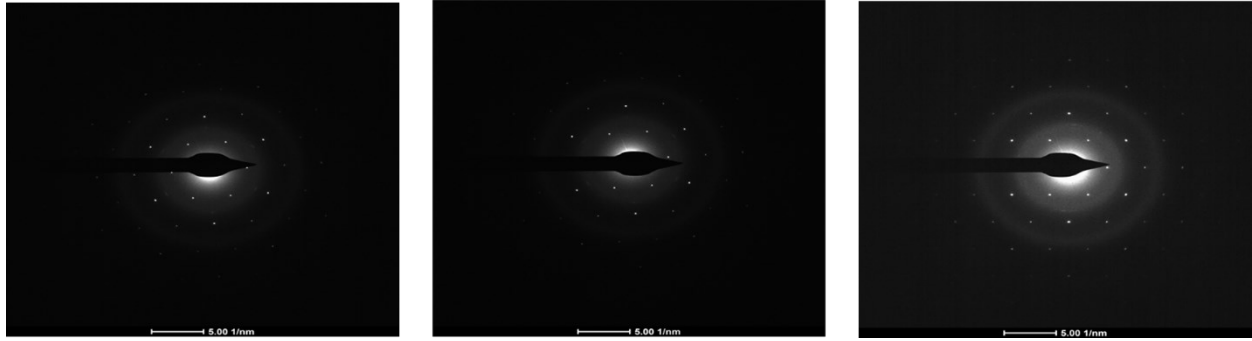

**Fig. S6.** SAED pattern for MoS<sub>2</sub> film at different points confirming the single crystal structure with (2H) hexagonal phase symmetry.

### Thickness of the MoS<sub>2</sub> film on sapphire:

In order to measure the thickness of the as-grown MoS<sub>2</sub> on sapphire, a scratch was made on the sample and the film was investigated using AFM. As shown in the AFM line profile image, the approximate thickness of the MoS<sub>2</sub> is estimated to be 0.8 nm, which is close to monolayer film thickness reported in the literature.

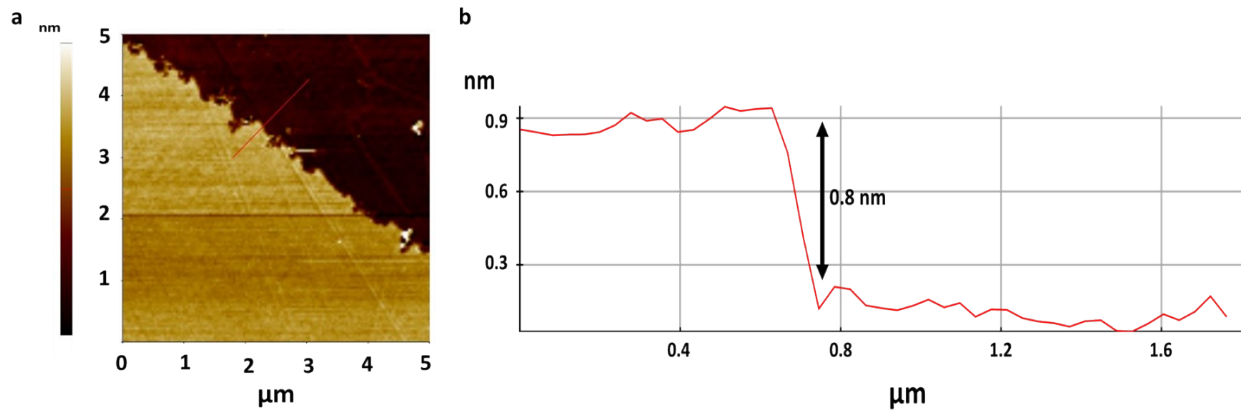

**Fig. S7. (a)** AFM surface topography of the MoS<sub>2</sub> layer on sapphire substrate. A scratch is intentionally made to measure the film thickness. **(b)** AFM line-profile made across the film-substrate interface (the red line in figure a), representing to estimation of film thickness.

**Size distribution of MoS<sub>2</sub> flakes:**

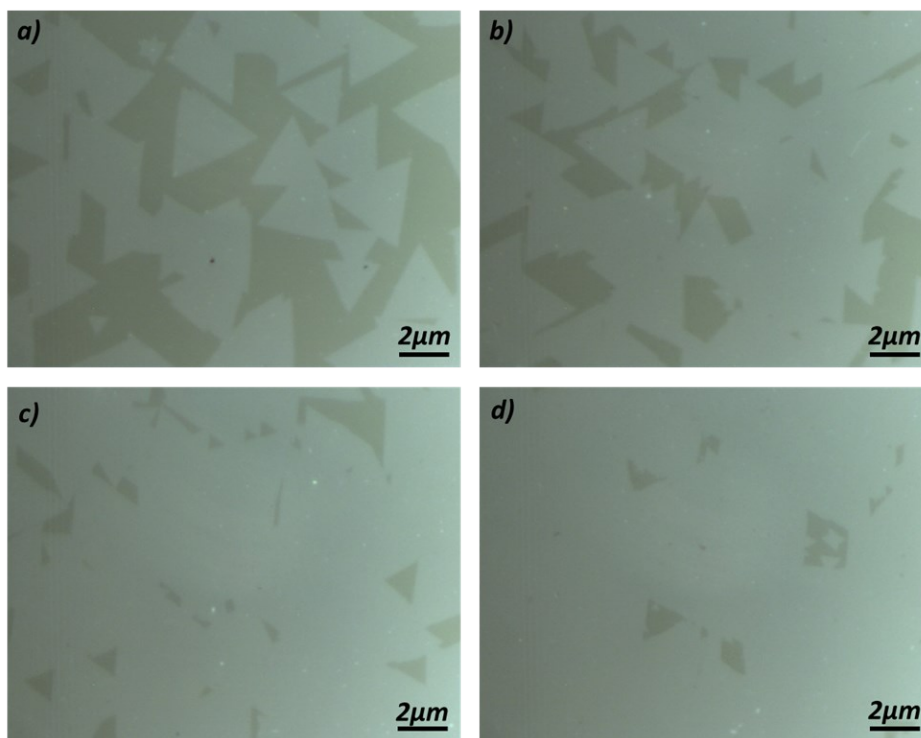

**Fig. S8.** Optical images of MoS<sub>2</sub> showing the size distribution of individual flakes. The average size of the flakes range from 3-10 μm.

**MoS<sub>2</sub> field-effect transistor:**

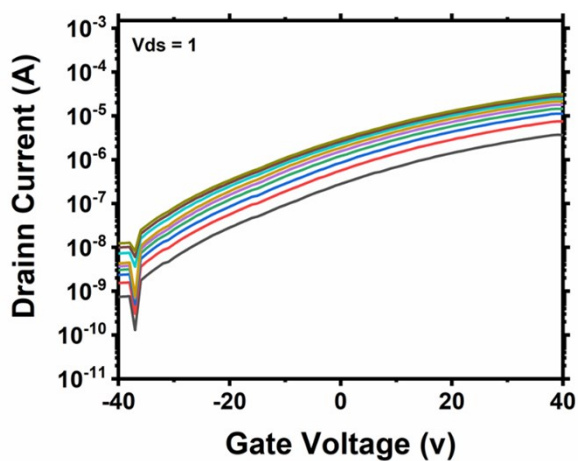

**Fig. S9.** Transfer characteristics measured for 10 devices and the estimated mobility values.
